# 1                   **Integrated multi-omics analysis to study the effects of simulated** 2                   **weightlessness on rhesus macaques (*Macaca mulatta*)**

3  
4 Peng Zhang<sup>1,2,\*</sup>, Libin Shao<sup>3,8,\*</sup>, Jie Zhang<sup>3,\*</sup>, Wenjiong Li<sup>1,\*</sup>, Guangyi Fan<sup>3,7</sup>, Ying Zhou<sup>6</sup>,  
5 Guanghan Kan<sup>1</sup>, Hongju Liu<sup>1</sup>, Weidong Li<sup>6</sup>, Fei Wang<sup>2</sup>, Xixia Chu<sup>6</sup>, Peng Han<sup>3</sup>, Ling Peng<sup>3</sup>,  
6 Xingmin Liu<sup>3</sup>, Jianwei Chen<sup>3</sup>, Xinming Liang<sup>4</sup>, Jingkai Ji<sup>4</sup>, Shiyi Du<sup>4</sup>, Zhanlong Mei<sup>4</sup>, Ronghui Li<sup>3</sup>,  
7 Xun Xu<sup>3,4,5,†</sup>, Shanguang Chen<sup>2,†</sup>, Xin Liu<sup>3,4,5,†</sup>, Xiaoping Chen<sup>1,2,†</sup>

8 <sup>1</sup>State Key Laboratory of Space Medicine Fundamentals and Application, China Astronaut  
9 Research and Training Center, Beijing 100094, China.

10 <sup>2</sup>National Key Laboratory of Human Factors Engineering, China Astronaut Research and Training  
11 Center, Beijing 100094, China.

12 <sup>3</sup>BGI-Qingdao, BGI-Shenzhen, Qingdao, 266555, China

13 <sup>4</sup>BGI-Shenzhen, Shenzhen 518083, China

14 <sup>5</sup>China National GeneBank, BGI-Shenzhen, Shenzhen 518120, China

15 <sup>6</sup>Bio-X Institutes, Key Laboratory for the Genetics of Developmental and Neuropsychiatric  
16 Disorders, Ministry of Education, Shanghai Jiao Tong University, Shanghai 200240, China

17 <sup>7</sup>State Key Laboratory of Quality Research in Chinese Medicine, Institute of Chinese Medical  
18 Sciences, University of Macau, Macao, China

19 <sup>8</sup>School of Biology and Biological Engineering, South China University of Technology,  
20 Guangzhou, 510006, China

21 \*These authors contributed equally to this work.

22 †Correspondence authors: Xun Xu([xuxun@genomics.cn](mailto:xuxun@genomics.cn)), Shanguang Chen ([tigermsg@163.com](mailto:tigermsg@163.com)),  
23 Xin Liu ([liuxin@genomics.cn](mailto:liuxin@genomics.cn)) and Xiaoping Chen ([xpchen2009@163.com](mailto:xpchen2009@163.com)).  
24  
25

## 26                   **Abstract**

27 Safety and health of astronauts in space is one of the most important aspects of space exploration,  
28 however, the genomic research about how a weightless space can affect astronaut's health was  
29 limited. In this study, we sequenced 25 transcriptomic, 42 metabolomic and 35 metagenomic data  
30 of 15 rhesus macaques (*Macaca mulatta*) spanning seven simulated weightlessness experiment  
31 stages. We identified 84 genes, 1911 features and 55 genera which are significantly changed in  
32 blood and muscle, hippocampal region, dorsomedial prefrontal cortex as well as fecal, respectively.

33 Furthermore, performing the integrated analysis of three omics data, we found several pathways  
34 which were related to regulation of immune system process, glucose uptake, reaction to threatens,  
35 neurotoxic and bone or joints damage, such as tyrosine metabolism and tryptophan metabolism.  
36 Our results provided an initial attempt of "multi-omics" approaches which combined  
37 transcriptomics, metabolomics and metagenomics to illustrate some molecular clues for simulated  
38 weightlessness effect on the rhesus macaques and potential sight of microgravity's effect on  
39 astronauts' health.

40

#### 41 **Keywords**

42 weightlessness, transcriptomics, metabolomics, metagenomics, immune

43

#### 44 **Introduction**

45 Since the first traveling to space, the frequency of long-term spaceflight has increased rapidly.  
46 However, health issues are threatening mankind's space exploring and the normal life of retired  
47 astronauts. Because research under real condition of spaceflight is limited, researchers often use  
48 ground-based analogs to study spaceflight's effect on organisms. One such popular model is the  
49 head down-tilt bed rest (HDBR) which mimics the headward fluid shift and axial body unloading  
50 of spaceflight [1], and in which organisms remain either horizontal or -6 degree HDBR for days to  
51 months [1, 2]. Several previous studies suggested that long duration space flight can affect  
52 intracranial pressure [3], brain structure and function [4, 5], osteoclastogenesis [6], blood pressure  
53 [7], visual impairment [8] and the immune system [9, 10], indicating that solutions for maintain  
54 astronaut's health. Multiple studies on space traveling astronauts, animals and plants, as well as  
55 microgravity analogues on animal models have been taken to study the biology changes during and  
56 after the spaceflight [11, 14].

57 The characteristics of space environment have two main factors, space radiation and  
58 microgravity [15]. It has been reported that the space radiation can damage DNA, leading to  
59 potentially harmful health consequences [15]. Space flight, especially microgravity, is one of the  
60 most extreme conditions that humans encounter [16]. However, little is known about the changes  
61 of gene expression, gut microbiota and metabolites of astronaut under microgravity. Addition of  
62 omics profiling to microgravity space flight experiments will understand key areas of variance in  
63 the molecular landscape [17]. The genomic and transcriptome studies can find gene expressions  
64 under difference environmental [18]. Space flight affects the community behavior of bacteria that  
65 harmful and beneficial human microbial interactions change during space flight [19]. About  
66 microgravity of systemic immune dysfunction may make the host more susceptible to pathogen  
67 infection [16]. Besides, metabolomics, the comprehensive study of metabolic reactions, was  
68 applied to study the metabolite profile in the studies of spaceflight effects on astronauts [2, 7],  
69 which help to understand the mechanism of physiological changes during and after space life. Thus,  
70 the results of integrated omics analysis could be used for aerospace medicine and research [17].

71 In this study, we recruited 15 rhesus macaques in different stages of ground-based HDBR analog  
72 using transcriptomics, metabolomics and metagenomics to understand the effects of weightless  
73 space flight analogues (HDBR) in rhesus macaques. As far as we know, our study will be the first  
74 multi-omics sights into the molecular study of space flight analogues.

75

## 76 **Results**

### 77 **Metabolism significance of rhesus macaques in HDBR study**

78 To investigate the effect of spaceflight on metabolism, we established a head down-tilt bed rest  
79 (HDBR) model using rhesus macaques. We then used ultra-performance liquid chromatography /  
80 mass spectrometry (UPLC/MS)-based metabolomics approach to quantify the metabolism  
81 signatures of the muscle, hippocampal region (HIP), dorsomedial prefrontal cortex (dmPFC) of 15  
82 rhesus macaques in three different time points: pre-HDBR (control, T1), HDBR (T4) and recovery

83 states (T7) (Figure 1, Table S1). We firstly conducted pair-wised comparison among these three  
84 time points using univariate and multivariable analysis. 356, 287 and 100 significantly different  
85 abundance features (DAFs) were identified in muscle by comparing HDBR to control, recovery to  
86 HDBR, and recovery to control, respectively ( $P < 0.05$ , fold change  $> 1.2$  or fold change  $< 1/1.2$ ,  
87  $VIP > 1$ , Figure S1). Besides, we also identified 328, 430 and 177 DAFs in HIP; 368, 472 and 109  
88 DAFs in dmPFC. For the further analysis, we mainly focused on the 154, 198 and 207 DAFs that  
89 were significantly changed in HDBR comparing to control and recovery in muscle, HIP and dmPFC,  
90 respectively ( $P < 0.05$ , Figure 2a, Figures S2a and S2b). Based on KEGG pathways analysis (Table  
91 S5), we found that the tryptophan metabolism pathway emerged in all comparisons of three tissues  
92 and tyrosine metabolism pathway contained 8 metabolites emerged in comparisons of muscle and  
93 dmPFC. Out of these eight metabolites, L-dopa (3,4-dihydroxy-L-phenylalanine, C00355,  
94 HMDB00609), L-Norepinephrine (C00547, HMDB00216), epinephrine (C00788, HMDB00068),  
95 L-Metanephrine (C05588, HMDB04063) were reported to be involved in neurotransmitter  
96 precursor, blood pressure control, stress reaction, glucose uptake and energy metabolism [20, 24].

97 In addition, to observe the interaction of these DAFs, we performed the weighted correlation  
98 network analysis (WGCNA) for three tissues, respectively [34]. In details, we classified 552 DAFs  
99 into six modules in muscle, 668 DAFs into seven modules in HIP and 691 DAFs into six modules  
100 in dmPFC, respectively (Figure 2b, Figures S3a and S3b). Particularly, we found the DAFs of  
101 tyrosine metabolism pathway (mcc00350) mainly distributed in three modules (M1, M5 and M6).  
102 Interestingly, the DAFs of M1 showed a good co-abundant pattern in muscle that all of these  
103 features decreased in HDBR and increased in recovery (Figure S3c and Figure 2c). Among them,  
104 the abundance of L-Alanine (C00041, HMDB00161), L-Carnitine (C00318, HMDB00062) and  
105 calcitric acid (HMDB06472) were decreased, which might be related to the muscle weakness and  
106 bone loss (Figures S3d-S3f). L-Alanine (C00041, HMDB00161) is an important amino acid in  
107 glucose-alanine cycle, which moves gluconeogenesis from muscle to liver to produce ATP stored  
108 in muscle for muscle contraction [26]. L-Carnitine ((C00041, HMDB00161) is most abundant in

109 skeletal muscle and cardiac muscle, and it activates and transports fatty acids into the mitochondria  
110 for energy generation in skeletal muscle [27]. Calcitroic acid (HMDB06472) is a major metabolite  
111 from 1,25-Dihydroxyvitamin D<sub>3</sub> which plays an important role on bone homeostasis and resorption,  
112 was found decreasing after long-term bed rest or space flight [38] [28]. Besides, we found that  
113 epinephrine (C00788, HMDB00068) was increased the metabolic rate in skeletal muscle (C00788,  
114 HMDB00068) [30], and it was the hub metabolite of M1 (Figure 2d). Pyridoxamine (C00534,  
115 HMDB01431) was the hub metabolite of M6, which was one form of vitamin B<sub>6</sub> taking part in  
116 metabolism of L-Alanine.

### 117 **Gut microbiome changes of rhesus macaque in HDBR study**

118 The gastrointestinal tract harbors most of microbes, which play important roles in organisms' health,  
119 disease, immunity, and even behavior [31, 32]. To investigate the effect of HDBR on the  
120 microbiome, we sequenced 35 metagenomics gut samples from five rhesus macaque individuals of  
121 seven time points (T1~T7) of HDBR analog (Figure 1). We generated a total of 286.86 Gb raw  
122 data and 275.99 Gb high-quality data after removing low quality data and the host, the average  
123 clean data was 7.89 Gb for each sample (Table S2). Then, we constructed a reference gene  
124 catalogue of rhesus macaque's gut metagenome using all samples (Table S3). Among of these  
125 genes, 63.10% of gene catalogue could be annotated to phylum level, 21.00% to genus level, and  
126 2.43% to species level. And 45.51% could be annotated to 6,631 KEGG Orthologs (KOs).

127 From the annotation of microbiome species, we found that Firmicutes and Bacteroidetes were  
128 dominated on the phylum level, as well as Prevotella and Clostridium were the dominated genera  
129 on the genus level (Figure S4). From the annotation of KEGG function, K03088, K03327, K06147,  
130 K00599 and K00754 were most dominated KOs with a higher abundance which annotated to  
131 transcription machinery, ion-coupled transporters, transporters, histidine metabolism/tyrosine  
132 metabolism and fructose and mannose metabolism. In all, 49.48% of genera and 95.58% of KO  
133 functions were shared by monkey, human gut gene catalogues (Figure S5).

134 We identified 55 genera with a significant change of abundance from T1 to T7 (Table S6).  
135 Interestingly, out of these 55 genera, 43% of them had decreased in their abundance in the  
136 experimental stages (T2~T4) and increase during the recovery phases (T5-T7). These genera  
137 include such as *Acinetobacter* and *Lactococcus*, which is involved regulation of inflammation [33,  
138 34, 35] and protection of infections [36], indicating that HDBR caused a disorder in the rhesus  
139 macaque's intestinal flora (Figure 3a and 3b). The abundance of two genera had been decrease  
140 continuously throughout the study, such as *Bifidobacterium*, which could modulate host immune  
141 responses, inhibit infection by pathogens, and regulate intestinal microbial homeostasis [37, 38, 39]  
142 (Figure 3c). In addition, we found 537 KOs with significantly changed abundance were assigned  
143 into 139 genera, of which 27 genera were significantly changed during T1 to T7 ( $P < 0.05$ ).  
144 Correlation analysis showed that 44.76% of pair-wise correlation between KOs and genera were  
145 positive, whereas only 3.38% correlation were negative ( $R^2 > 0.3$ ,  $P < 0.05$ ) (Figure 3d). This results  
146 indicate that the changes of genera abundance positively affect the gut microbial function, such as  
147 *Myroides* and *Acinetobacter*, which could help to improve the K00121, K00151, K00276, K00451  
148 and K01555 which participate in tyrosine metabolism pathway. In summary, our findings revealed  
149 that HDBR affects the abundance of gut microbiome, which might be related to the host immune  
150 response and metabolism.

### 151 **Transcription features of rhesus macaque in HDBR study**

152 To investigate the effect of HDBR on gene expression in immune cells, we collected 25 blood  
153 samples from five rhesus macaque individuals of six time points (T1, T3~T7) (Figure 1). We  
154 generated 779.09 M reads in six time points of HDBR analog (Table S4). Using pairwise  
155 comparison of each time point, we detected 84 significantly differential expressed genes (DEGs,  
156 fold change  $> 2$  and  $P < 0.05$ ) in at least two time points. We firstly focused on 65 DEGs in HDBR  
157 (T3 and T4) comparing to the control (T1) and the recovery phases (T5~T7, Figure 4a). These  
158 DEGs were significantly enriched in 44 biological processes ( $P < 0.05$ ), and 41 of them were related  
159 to the regulation of immune system, including regulation of leukocyte activation (GO:0002694),

160 regulation of T cell differentiation (GO:0045580) and regulation of interleukin-2 production  
161 (GO:0032663) (Figure 4b and Table S7). DEGs in these immune response biological processes  
162 were mainly down-regulated in the HDBR, which were consistent with the previous researches  
163 about the immune system of animal and human in simulated long-term microgravity environment  
164 [36][40]. In addition, we also found 71 DEGs in recovery status (T5~T7) comparing to the control  
165 (T1, Figure 4a), which were also mainly enriched in the immune system. Besides, WGCNA [25]  
166 method was employed to construct genes co-expression networks in transcriptomes, 1941 genes  
167 with max median absolute deviation (MAD) were clustered into eleven modules. In accordance  
168 with the differential expression analysis, genes in the purple module were mainly related to immune  
169 response (Table S8) with the expression dropped in HDBR.

#### 170 **Integrated analysis of omics data in rhesus macaque**

171 Short-chain fatty acids (SCFA) is a dominant metabolite produced from bacteria, related to the  
172 immune response, such as butyrate regulates the size and function of the regulatory T cell network  
173 by promoting the induction and fitness of regulatory T cells in the colonic environment [41, 42,  
174 43]. In our study, DEGs in lymphatic cells were related to reduce immune response and  
175 dysregulation of muscle butyrate metabolism. In the gut microbiome, the relative abundance of  
176 butyrate-producing colon bacteria *Eubacterium*, *Roseburia* and their cross-feeding bacteria  
177 *Bifidobacteria* were reduced in the HDBR. Thus, our results revealed that the weak immune  
178 response and the reduced abundance of butyrate during HDBR might be related to the abundance  
179 change of gut microbe (Figure 5).

180 Besides, previous study showed that 3-hydroxyphenylacetate is a by-product of the tyrosine  
181 metabolism mediated by *Clostridium spp* [28]. Enzyme 4-hydroxyphenylacetate 3-monooxygenase  
182 (EC: 1.14.14.9), which was not found in rhesus macaque, could transform 3-hydroxyphenylacetate  
183 (C00642, HMDB00020) to 3,4-Dihydroxybenzeneacetic acid (3,4DPHAA, C01161, HMDB01336)  
184 in tyrosine metabolism. Coincidentally, enzyme 4-hydroxyphenylacetate 3-monooxygenase and  
185 3,4DPHAA both increased in during HDBR and decreased during the recovery phase, consistent

186 with the abundance changes of a gut microbe *Providencia rettgeri* which produces enzyme 4-  
187 hydroxyphenylacetate 3-monooxygenase (EC: 1.14.14.9), indicating *Providencia rettgeri*  
188 influence tyrosine metabolism by producing 3,4DPHAA (Figure 5). Besides, we also found enzyme  
189 tryptophan 2,3-dioxygenase (EC: 1.13.11.11) could produce N'-Formylkynurenine (C02700,  
190 HMDB60485), which then transformed to Formylanthranilic acid (C05653, HMDB04089) by  
191 enzyme kynureninase (EC: 3.7.1.3) in tryptophan metabolism. Enzyme tryptophan 2,3-  
192 dioxygenase and kynureninase could be produced by the gut microbes with abundance change  
193 during HDBR, such as *Myroides* and *Comamonas*. Furthermore, we found *Myroide* were positively  
194 and significantly correlated with Leucodopachrome (C05604, HMDB04067) and Dopaquinone  
195 (C00822, HMDB01229) in the tyrosine metabolism pathway (mcc00350) and *Providencia* were  
196 found positively and significantly correlated with p-Cresol (C01468, HMDB01858) which is a  
197 metabolite of tyrosine (P<0.05). Meanwhile, *Lactococcus* were positively correlated with L-  
198 Carnitine (C00318, HMDB00062) which is crucial in providing energy to muscles [27] (Figure S6).  
199 Therefore, the significantly changed abundance of gut microbes were involved in tyrosine  
200 metabolism (mcc00350) and tryptophan metabolism (mcc00380) pathways during the HDBR  
201 analog (P<0.05).

## 202 **Discussion**

203 Living in a space environment with microgravity and motionless for long periods of time may have  
204 adverse effects on immunity, metabolism and health. The first report from the Soviet immunologist,  
205 Konstantinova and coworkers [44], found that lymphocyte responsiveness to mitogens was  
206 remarkably reduced after astronauts after a longtime spaceflight. In this study, we applied  
207 transcriptomic, metabolomic and metagenomic analysis in a head down-tilt bed rest model to  
208 elucidate the effect of spaceflight and analogue microgravity environment on biology functions. In  
209 transcriptome data, DEGs were enriched in multiple biological processes mainly related to immune  
210 response, indicating that gene expression has plausible functional connections with spaceflight and  
211 microgravity. For the first time, we also found the effects of an analogue microgravity environment



212 on immunity by combining metabolomics and metagenomics. We found that tyrosine metabolism,  
213 which plays an important role in muscle function, was affected by HDBR. The abundance of L-  
214 Dopa, norepinephrine, epinephrine and L-Metanephrine in catecholamines biosynthesis and  
215 metabolism pathway, dopaquinone and leucodopachrome in L-Dopachrome biosynthesis pathway  
216 and 4-Hydroxyphenylpyruvate and homogentisate in homogentisate biosynthesis pathway were  
217 significantly affected by HDBR (Figure 2e). We also found that calcitric acid (related to bone  
218 balance), L-Alanine and L-Carnitine (related to muscle contraction and muscle weakness) were  
219 affected by HDBR.

220 To our knowledge, this was the first study successfully combining metabolomics and  
221 metagenomics in studying simulated microgravity on health and metabolism. The findings  
222 provided valuable insights into how long-term spaceflight could affect metabolism and health.  
223 More importantly, our findings on the link between gut microbiome with metabolism and immunity  
224 provided the possible solutions to combat dysregulated immunity and metabolism in spaceflight.  
225 This study was conducted with animal model in a simulated environment, we supposed a solid  
226 combination of omics in the study of astronauts could be a useful tool for future study of astronauts  
227 in extremely environment. Further study with more astronauts would provide more information  
228 during long term space flight.

229

## 230 **Materials and Method**

### 231 **Animal experiments**

232 We sampled 20 healthy male rhesus macaques, aged 4 to 6 years and weighing 4 to 8 kg from  
233 Beijing Institute of Xie'erxin Biology Resource (Beijing, China). All of these rhesus macaques  
234 received 3 months of domestication (involving preliminary caretaker handling, confinement jacket  
235 fitting, and tilt-table acclimation training) at the Laboratory Animal Center of China Astronaut  
236 Research and Training Center prior to the start of the experiments. Only 15 well-domesticated  
237 rhesus macaques were selected and separated into 3 groups: 1) CON: ground-based controls, 2)

238 HDBR: 42 days of HDBR, 3) REC: 42 days of HDBR plus 32 days of recovery.

239 A six-week head-down tilted bed rest (HDBR) experiment was performed on rhesus macaques  
240 to simulate weightlessness as described previously [45]. Briefly, rhesus macaques laid on beds,  
241 which were tilted backward 10 °C from the horizontal. The head-down monkeys wore the  
242 confinement jacket, which enabled them to be fixed to the bed. These rhesus macaques were housed  
243 one per bed in rooms with air temperature maintained at  $23 \pm 2^{\circ}\text{C}$  and a standard 12:12 h dark–  
244 light cycle (lights were turned on at 8:00 a.m. and off at 8:00 p.m.). After six weeks of HDBR, each  
245 rhesus macaque was solely removed into stainless steel mesh cages to recovery for 32 days.  
246 Throughout the duration of the experiment, rhesus macaques received an intensive humanistic care.  
247 For instance, the rhesus macaques always had free access to food and water. Toys (such as the  
248 drum-shaped rattle, a Chinese traditional toy) were available all the time except during  
249 experimental procedures. The caretaker accompanied the rhesus macaques during the day time to  
250 help relieve anxiety. The general health condition of the rhesus macaques was also carefully  
251 monitored. All procedures were performed in accordance with the principles of the Association for  
252 Assessment and Accreditation of Laboratory Animal Care International (AAALAC), approved by  
253 Institutional Animal Care and Use Committee of China Astronaut Research and Training Center  
254 (ACC-IACUC-2014-001).

### 255 **Sample collection**

256 All samples provided consent forms which were approved by BGI genomics Committee of Ethics.  
257 Under light ketamine sedation, sterile heparinized peripheral blood samples were obtained from  
258 femoral vein of the five rhesus macaques in REC group before (Pre-3, T1), during (HB-12, HB-25,  
259 HB-40, T2~T4) and after (R-12, R-24, R-32, T5~T7) the HDBR at 10:00 a.m. Peripheral blood  
260 mononuclear cells (PBMCs) were then collected by Ficoll-Hypaque density-gradient centrifugation.  
261 Fecal samples were also collected from the five rhesus macaques in REC group before (Pre-2, T1),  
262 during (HB-16, HB-30, HB-42, T2~T4) and after (R-13, R-17, R-28, T5~T7) the HDBR. Skeletal  
263 muscle sample, dmPFC sample and HIP sample were collected from all of the selected rhesus

264 macaques in each group.

### 265 **Transcriptome analysis**

266 mRNA of the PBMCs was isolated by oligo(dT) and sequenced by Complete Genomics(CG) SE50,  
267 we then use SOAPnuke to filter out the reads of low quality, at least 20 million reads were generated  
268 for each sample. HISAT2 was applied to map sequence reads to genome and RSEM to calculate  
269 the FPKM. Spearman correlation between all samples were calculated using FPKM, the correlation  
270 between all samples was very high ( $>0.95$ ) and the biological replicates did not cluster well together.  
271 We used DESeq2 package in R to find different expressed genes [46], and GO was used to  
272 annotated function information.

### 273 **Metabolomics analysis**

274 UPLC-MS technology was implemented for metabolites detection. The experimental quality was  
275 evaluated by quality control (QC) samples. Features alignment, picking and identification were  
276 performed by Progenesis QI (Waters, Nonlinear Dynamics, Newcastle, UK). MetaX software was  
277 used for data cleaning and statistical analysis [47]. Low quality features were removed within data  
278 cleaning. By combining the univariate and multivariate statistical analysis, significantly changed  
279 features (P value $<0.05$ , fold change  $<1/1.2$  or fold change  $>1.2$ , VIP  $>1$ ) were acquired. Those  
280 features were further annotated by Progenesis QI with Human Metabolome databases (version 3.6),  
281 and online Kyoto Encyclopedia of Genes and Genomes database ([www.genome.jp/kegg/](http://www.genome.jp/kegg/)).

282 Clusters of co-abundant metabolites of muscle, HIP and dmPFC were performed by R package  
283 WGCNA [25], respectively. Soft threshold  $\beta=9$  for muscle features, soft threshold  $\beta=13$  for dmPFC  
284 features, and soft threshold  $\beta=12$  for HIP features were chosen by scale free topology analysis, for  
285 signed, weighted features co-abundance correlation network construction. Dynamic hybrid tree-  
286 cutting algorithm by deepSplit of 4 and a minimum cluster size of 30 were applied for clusters  
287 identification. If the biweight mid-correlation between the cluster's eigenvectors exceeded 0.8, the  
288 similar clusters would be subsequently merged. The muscle, dmPFC and HIP features clusters,  
289 were labelled by M1-M6, D1-D7 and H1-H6, respectively.

290 **Metagenomics analysis**

291 Raw reads sequenced on the Illumina Hiseq 2000 platform (Expression Analysis Inc., San Diego,  
292 CA, USA) at BGI were filtered to remove the adaptor contamination, low-quality reads and host  
293 genomic DNA (Rhesus macaques, assembly Mmul\_8.0.1, NCBI). The remaining high-quality  
294 reads were assembled by metaSPAdes (v3.10.1). Open Reading Frames (ORFs) in contigs of each  
295 sample were obtained using GeneMark (v2.7). The non-redundant gene set of all ORFs was  
296 clustered using CD-HIT (v4.5.7) based on nucleotide sequence and the identity is 95% at the  
297 coverage 90%. Taxonomic annotation of gene set was made with CARMA3 on the basis of  
298 BLASTP alignment with bacteria and archaea from NCBI-NR database. And the gene set was also  
299 annotated against KEGG (v59) databases with BLAST (v2.2.23).

300 Gene abundance profiling was calculated based on the alignment of SOAP2 and the species  
301 abundant profile and functional profile were summarized from their respective genes [48]. The  
302 differential alpha diversity, species and KOs of different time points were calculated using R  
303 `kruskal.test`. Spearman coefficient was used to calculate the relationship between different genus  
304 and different Kos, between different genus and different metabolic features according to their  
305 abundance.

306

307 **Acknowledgments**

308 This work was supported by grants from the National Basic Research Program of China  
309 (2011CB711003), the National Natural Science Foundation of China (81772016, 81272177) and  
310 the 1226 major project (AWS16J018) to X.C.

311

312

313 **Competing interests**

314 Competing interest statement: The author denies that he has any intention to obtain any financial  
315 interests.

316

317 **Figure 1. Overview of the study integrating metabolome, metagenome and transcriptome data**  
318 **and rhesus macaques HDBR experiments.** Experimental Design for 15 rhesus macaques HDBR  
319 experiments. Each group of 5 rhesus macaques participated in this experiment. 5 rhesus macaques  
320 before HDBR were chosen for muscle, HIP and dmPFC tissues obtaining. 5 of the others took part  
321 in following HDBR experiment, then muscle, HIP and dmPFC tissues of which at HDBR 42 days  
322 were obtained. The 5 remaining rhesus macaques got into recovery experiments, and muscle, HIP  
323 and dmPFC tissues were obtained at 32 days after recovery experiment. Among all the experiments,  
324 blood samples 3 days before HDBR, 12 days, 25, and 40 days during HDBR, 12 days, 24, 32 days  
325 during recovery, and fecal samples 2 days before HDBR, 16 days, 30, and 42 days during HDBR,  
326 and 13 days, 17 and 28 days during recovery were all collected from the last 5 rhesus macaques.  
327

328 **Figure 2. Meaningful metabolites and tyrosine metabolism pathway were found in muscle by**  
329 **metabolomics analysis.**(a)A heatmap of 154 DAFs which only changing significantly in HDBR  
330 comparing to control and recovery in muscle.(b)Dendrogram of 552 muscle DAFs mainly  
331 clustering into 6 modules by WGCNA analysis. 6 modules colored with ‘turquoise’, ‘yellow’, ‘red’,  
332 ‘green’, ‘blue’ and ‘brown’ were labeled by ‘M1’ - ‘M6’, respectively. And ‘grey’ module included  
333 the remaining DAFs that did not fit clustering criteria.(c)A heatmap of DAFs in M1 showing that  
334 all DAFs down-regulated during HDBR and up-regulated during recovery in  
335 muscle.(d)Epinephrine was the hub metabolite of M1 network in muscle. Correlation of M1 DAFs  
336 were calculated by WGCNA. And the bigger size of the node means the more neighbor of this node.  
337 The adjacent lines of epinephrine colored with ‘red’, and the others colored with ‘light gray’.(e)11  
338 significantly changed muscle metabolites showing in tyrosine metabolism pathway. 5 metabolites  
339 in M1 decreasing during HDBR and increasing during recovery were colored with ‘turquoise’, 3  
340 metabolites in M2 showing opposite changes to M1 were colored with blue. And 5 metabolites in  
341 M3 showing similar trend with M1 were colored with brown. The 5 remaining metabolites colored  
342 with grey weren’t found in differential metabolites.

343

344 **Figure 3. Several important intestinal genera alterations in seven time points with 95% confidence**

345 **interval for the medians, and associations of differential gut microbial genera with differential**

346 **KOs.**(a-c) Box plot of the differential genera abundance of Acinetobacter, Lactococcus and

347 Bifidobacterium. The x coordinate represents T1~T7 time points, y coordinate represents the genera

348 abundance (log10). For each interquartile ranges (IQRs), the first and third quartiles were showed as the

349 boxes, and the line inside the box represents the median. The circles data points represent the outside of

350 the whiskers which marked as the lowest or highest values within 1.5 times IQR boxes.(d) Spearman

351 correlation coefficient heatmap ( $P < 0.05$ ) between 27 genera differed in abundance (x coordinate) and

352 442 Kos differed in abundance (y coordinate). The red color represented significantly positive

353 correlation, the blue color represented significantly negative correlation, and blank areas indicate no

354 significant correlation.

355

356 **Figure 4. Interesting DEGs and biological processes found in transcriptomics**

357 **analysis.**(a)Histograms of DEGs between any two time points. Up-regulated and down-regulated DEGs

358 were colored with 'orange' and 'blue', respectively. (b)GO analyses of the 65 DEGs showing a

359 significant enrichment of several biological processes.

360

361 **Figure 5. Reducing gut microbes produced lesser butyrate to weaken the host immune**

362 **response, and the gut microbes might take part in tyrosine metabolism (mcc00350) and**

363 **tryptophan metabolism pathway (mcc00380).**

364

365

366

367

368

369

370 **References**

- 371 [1] Hargens, A. R., & Vico, L. (2016). Long-duration bed rest as an analog to microgravity. *Journal*  
372 *of applied physiology*, 120(8), 891-903.
- 373 [2] Smith, S. M., Heer, M., Wang, Z., Huntoon, C. L., & Zwart, S. R. (2012). Long-duration space  
374 flight and bed rest effects on testosterone and other steroids. *The Journal of Clinical Endocrinology*  
375 *& Metabolism*, 97(1), 270-278.
- 376 [3] Marshall-Bowman, K., Barratt, M. R., & Gibson, C. R. (2013). Ophthalmic changes and increased  
377 intracranial pressure associated with long duration spaceflight: an emerging understanding. *Acta*  
378 *Astronautica*, 87, 77-87.
- 379 [4] Pompeiano, O., d'Ascanio, P., Balaban, E., Centini, C., & Pompeiano, M. (2004). Gene expression  
380 in autonomic areas of the medulla and the central nucleus of the amygdala in rats during and after  
381 space flight. *Neuroscience*, 124(1), 53-69.
- 382 [5] Demertzi, A., Van Ombergen, A., Tomilovskaya, E., Jeurissen, B., Pechenkova, E., Di Perri, C., ...  
383 & Sijbers, J. (2016). Cortical reorganization in an astronaut's brain after long-duration spaceflight.  
384 *Brain Structure and function*, 221(5), 2873-2876.
- 385 [6] Rucci, N., Rufo, A., Alamanou, M., & Teti, A. (2007). Modeled microgravity stimulates  
386 osteoclastogenesis and bone resorption by increasing osteoblast RANKL/OPG ratio. *Journal of*  
387 *cellular biochemistry*, 100(2), 464-473.
- 388 [7] Fritsch-Yelle, J. M., Charles, J. B., Jones, M. M., Beightol, L. A., & Eckberg, D. L. (1994).  
389 Spaceflight alters autonomic regulation of arterial pressure in humans. *Journal of Applied*  
390 *Physiology*, 77(4), 1776-1783.
- 391 [8] Mader, T. H., Gibson, C. R., Pass, A. F., Kramer, L. A., Lee, A. G., Fogarty, J., ... & Phillips, J. L.  
392 (2011). Optic disc edema, globe flattening, choroidal folds, and hyperopic shifts observed in  
393 astronauts after long-duration space flight. *Ophthalmology*, 118(10), 2058-2069.
- 394 [9] Sonnenfeld, G., & Shearer, W. T. (2002). Immune function during space flight. *Nutrition*, 18(10),  
395 899-903.
- 396 [10] Taylor, G. R., & Janney, R. P. (1992). In vivo testing confirms a blunting of the human cell-  
397 mediated immune mechanism during space flight. *Journal of Leukocyte Biology*, 51(2), 129-132.
- 398 [11] Smith, S. M., Abrams, S. A., Davis-Street, J. E., Heer, M., O'Brien, K. O., Wastney, M. E., & Zwart,  
399 S. R. (2014). Fifty years of human space travel: implications for bone and calcium research. *Annual*  
400 *review of nutrition*, 34, 377-400.
- 401 [12] Taylor, K., Kleinhesselink, K., George, M. D., Morgan, R., Smallwood, T., Hammonds, A. S., ... &  
402 Hoshizaki, D. K. (2014). Toll mediated infection response is altered by gravity and spaceflight in  
403 *Drosophila*. *PloS one*, 9(1), e86485.
- 404 [13] Zhang, Y., Wang, L., Xie, J., & Zheng, H. (2015). Differential protein expression profiling of  
405 *Arabidopsis thaliana* callus under microgravity on board the Chinese SZ-8 spacecraft. *Planta*,  
406 241(2), 475-488.

- 407 [14] van Oosterhout, W. P. J., Terwindt, G. M., Vein, A. A., & Ferrari, M. D. (2015). Space headache on  
408 Earth: Head-down-tilted bed rest studies simulating outer-space microgravity. *Cephalalgia*, 35(4),  
409 335-343.
- 410 [15] Moreno-Villanueva M1,2, Wong M1,3, Lu T1,4, Zhang Y5, Wu H1. Interplay of space radiation and  
411 microgravity in DNA damage and DNA damage response. *NPJ Microgravity*. 2017 May 10;3:14.
- 412 [16] Li P1, Shi J1, Zhang P1, Wang K1, Li J1, Liu H1, Zhou Y1, Xu X1, Hao J1, Sun X1, Pang X1, Li  
413 Y1, Wu H1, Chen X2, Ge Q2. Simulated microgravity disrupts intestinal homeostasis and increases  
414 colitis susceptibility. *FASEB J*. 2015 Aug;29(8):3263-73
- 415 [17] Schmidt MA1, Goodwin TJ2. Personalized medicine in human space flight: using Omics based  
416 analyses to develop individualized countermeasures that enhance astronaut safety and  
417 performance. *Metabolomics*. 2013;9(6):1134-1156
- 418 [18] Srinivasan Shanmugarajan,1,2 Ye Zhang,3 Maria Moreno-Villanueva,1,4 Ryan Clanton,5 Larry H.  
419 Rohde,2 Govindarajan T. Ramesh,6 Jean D. Sibonga,1 and Honglu Wu1, Combined Effects of  
420 Simulated Microgravity and Radiation Exposure on Osteoclast Cell Fusion. *Int J Mol Sci*. 2017 Nov;  
421 18(11): 2443
- 422 [19] Ronald Anderson,1,\* Gregory Tintinger,1,2 Riana Cockeran,1 Moliehi Potjo,1 and Charles  
423 Feldman3. Beneficial and Harmful Interactions of Antibiotics with Microbial Pathogens and the Host  
424 Innate Immune System. *Pharmaceuticals (Basel)*. 2010 May; 3(5): 1694–1710.
- 425 [20] Lopez, V. M., Decatur, C. L., Stamer, W. D., Lynch, R. M., & McKay, B. S. (2008). L-DOPA is an  
426 endogenous ligand for OA1. *PLoS biology*, 6(9), e236.
- 427 [21] Hiroshima, Y., Miyamoto, H., Nakamura, F., Masukawa, D., Yamamoto, T., Muraoka, H., ... &  
428 Endo, I. (2014). The protein Ocular albinism 1 is the orphan GPCR GPR 143 and mediates  
429 depressor and bradycardic responses to DOPA in the nucleus tractus solitarius. *British journal of*  
430 *pharmacology*, 171(2), 403-414.
- 431 [22] Chrousos, G. P. (2009). Stress and disorders of the stress system. *Nature reviews endocrinology*,  
432 5(7), 374.
- 433 [23] Ratheiser, K. M., Brillon, D. J., Campbell, R. G., & Matthews, D. E. (1998). Epinephrine produces a  
434 prolonged elevation in metabolic rate in humans. *The American journal of clinical nutrition*, 68(5),  
435 1046-1052.



- 436 [24] Eisenhofer, G., Kopin, I. J., & Goldstein, D. S. (2004). Catecholamine metabolism: a contemporary  
437 view with implications for physiology and medicine. *Pharmacological reviews*, 56(3), 331-349.
- 438 [25] Langfelder, P., & Horvath, S. (2008). WGCNA: an R package for weighted correlation network  
439 analysis. *BMC bioinformatics*, 9(1), 559.
- 440 [26] Nelson, David L.; Cox, Michael M. (2005). *Principles of Biochemistry* (4th ed.). New York: W. H.  
441 Freeman, pp. 684–85, ISBN 0-7167-4339-6.
- 442 [27] Alesci, S., Manoli, I., Costello, R., Coates, P., Gold, P. W., Chrousos, G. P., & Blackman, M. R.  
443 (2004). Carnitine: Lessons from one hundred years of research. *Annals of the New York Academy*  
444 *of Sciences*, 1033.
- 445 [28] Yu, O. B., & Arnold, L. A. (2016). Calcitroic Acid—A Review. *ACS chemical biology*, 11(10),  
446 2665-2672.
- 447 [29] Smith, S. M., McCoy, T., Gazda, D., Morgan, J. L., Heer, M., & Zwart, S. R. (2012). Space flight  
448 calcium: implications for astronaut health, spacecraft operations, and Earth. *Nutrients*, 4(12), 2047-  
449 2068.
- 450 [30] Ratheiser, K. M., Brillon, D. J., Campbell, R. G., & Matthews, D. E. (1998). Epinephrine produces a  
451 prolonged elevation in metabolic rate in humans. *The American journal of clinical nutrition*, 68(5),  
452 1046-1052. .
- 453 [31] Schmidt, T. S., Raes, J., & Bork, P. (2018). The human gut microbiome: from association to  
454 modulation. *Cell*, 172(6), 1198-1215.
- 455 [32] Johnson, K. V. A., & Foster, K. R. (2018). Why does the microbiome affect behaviour?. *Nature*  
456 *Reviews Microbiology*, 1.
- 457 [33] Cekanaviciute, E., Yoo, B. B., Runia, T. F., Debelius, J. W., Singh, S., Nelson, C. A., ... & Crabtree-  
458 Hartman, E. (2017). Gut bacteria from multiple sclerosis patients modulate human T cells and  
459 exacerbate symptoms in mouse models. *Proceedings of the National Academy of Sciences*, 114(40),  
460 10713-10718.
- 461 [34] Visca, P., Seifert, H., & Towner, K. J. (2011). *Acinetobacter* infection—an emerging threat to human  
462 health. *IUBMB life*, 63(12), 1048-1054.
- 463 [35] Hughes, L. E., Bonell, S., Natt, R. S., Wilson, C., Tiwana, H., Ebringer, A., ... & Vowles, J. (2001).  
464 Antibody Responses to *Acinetobacter*spp. and *Pseudomonas aeruginosa* in Multiple Sclerosis:  
465 Prospects for Diagnosis Using the Myelin-Acinetobacter-Neurofilament Antibody Index. *Clinical*  
466 *and diagnostic laboratory immunology*, 8(6), 1181-1188.
- 467 [36] Nakamura, S., Morimoto, Y. V., & Kudo, S. (2015). A lactose fermentation product produced by  
468 *Lactococcus lactis* subsp. *lactis*, acetate, inhibits the motility of flagellated pathogenic  
469 bacteria. *Microbiology*, 161(4), 701-707.
- 470 [37] Mayo, B., & Van Sinderen, D. (Eds.). (2010). *Bifidobacteria: genomics and molecular aspects*.  
471 Horizon Scientific Press.

- 472 [38] Pinzone, M. R., Celesia, B. M., Di Rosa, M., Cacopardo, B., & Nunnari, G. (2012). Microbial  
473 translocation in chronic liver diseases. *International journal of microbiology*, 2012.
- 474 [39] Lievin, V., Peiffer, I., Hudault, S., Rochat, F., Brassart, D., Neeser, J. R., & Servin, A. L. (2000).  
475 *Bifidobacterium* strains from resident infant human gastrointestinal microflora exert antimicrobial  
476 activity. *Gut*, 47(5), 646-652.
- 477 [40] Luo, H., Wang, C., Feng, M., & Zhao, Y. (2014). Microgravity inhibits resting T cell immunity in  
478 an exposure time-dependent manner. *International journal of medical sciences*, 11(1), 87.
- 479 [41] Smith, P.M., Howitt, M.R., Panikov, N., Michaud, M., Gallini, C.A., Bohlooly-Y, M., Glickman,  
480 J.N., and Garrett, W.S. (2013). The microbial metabolites, short-chain fatty acids, regulate colonic  
481 Treg cell homeostasis. *Science* 341, 569–573.
- 482 [42] Furusawa, Y., Obata, Y., Fukuda, S., Endo, T.A., Nakato, G., Takahashi, D., Nakanishi, Y., Uetake,  
483 C., Kato, K., Kato, T., et al. (2013). Commensal microbe-derived butyrate induces the  
484 differentiation of colonic regulatory T cells. *Nature* 504, 446–450.
- 485 [43] Arpaia, N., Campbell, C., Fan, X., Dikiy, S., van der Veeken, J., deRoos, P., Liu, H., Cross, J.R.,  
486 Pfeffer, K., Coffey, P.J., and Rudensky, A.Y. (2013). Metabolites produced by commensal bacteria  
487 promote peripheral regulatory T-cell generation. *Nature* 504, 451–455.
- 488 [44] Gmünder, F. K., & Cogoli, A. (1996). Effect of space flight on lymphocyte function and immunity.  
489 *Handbook of Physiology*, 2, 799-813.
- 490 [45] Koenig SC1, Ewert DL, Ludwig DA, Fanton JF, Convertino VA. Bed rest affects ventricular and  
491 arterial elastances in monkeys: implications for humans. *Aviat Space Environ Med.* 2004  
492 Jan;75(1):7-15.
- 493 [46] Love, M. I., Huber, W., & Anders, S. (2014). Moderated estimation of fold change and dispersion  
494 for RNA-seq data with DESeq2. *Genome biology*, 15(12), 550.
- 495 [47] Wen, B., Mei, Z., Zeng, C., & Liu, S. (2017). metaX: a flexible and comprehensive software for  
496 processing metabolomics data. *BMC bioinformatics*, 18(1), 183.
- 497 [48] Xie, H., Guo, R., Zhong, H., Feng, Q., Lan, Z., Qin, B., ... & Chen, B. (2016). Shotgun  
498 metagenomics of 250 adult twins reveals genetic and environmental impacts on the gut  
499 microbiome. *Cell systems*, 3(6), 572-584.

500

501

502

503

504

505

506

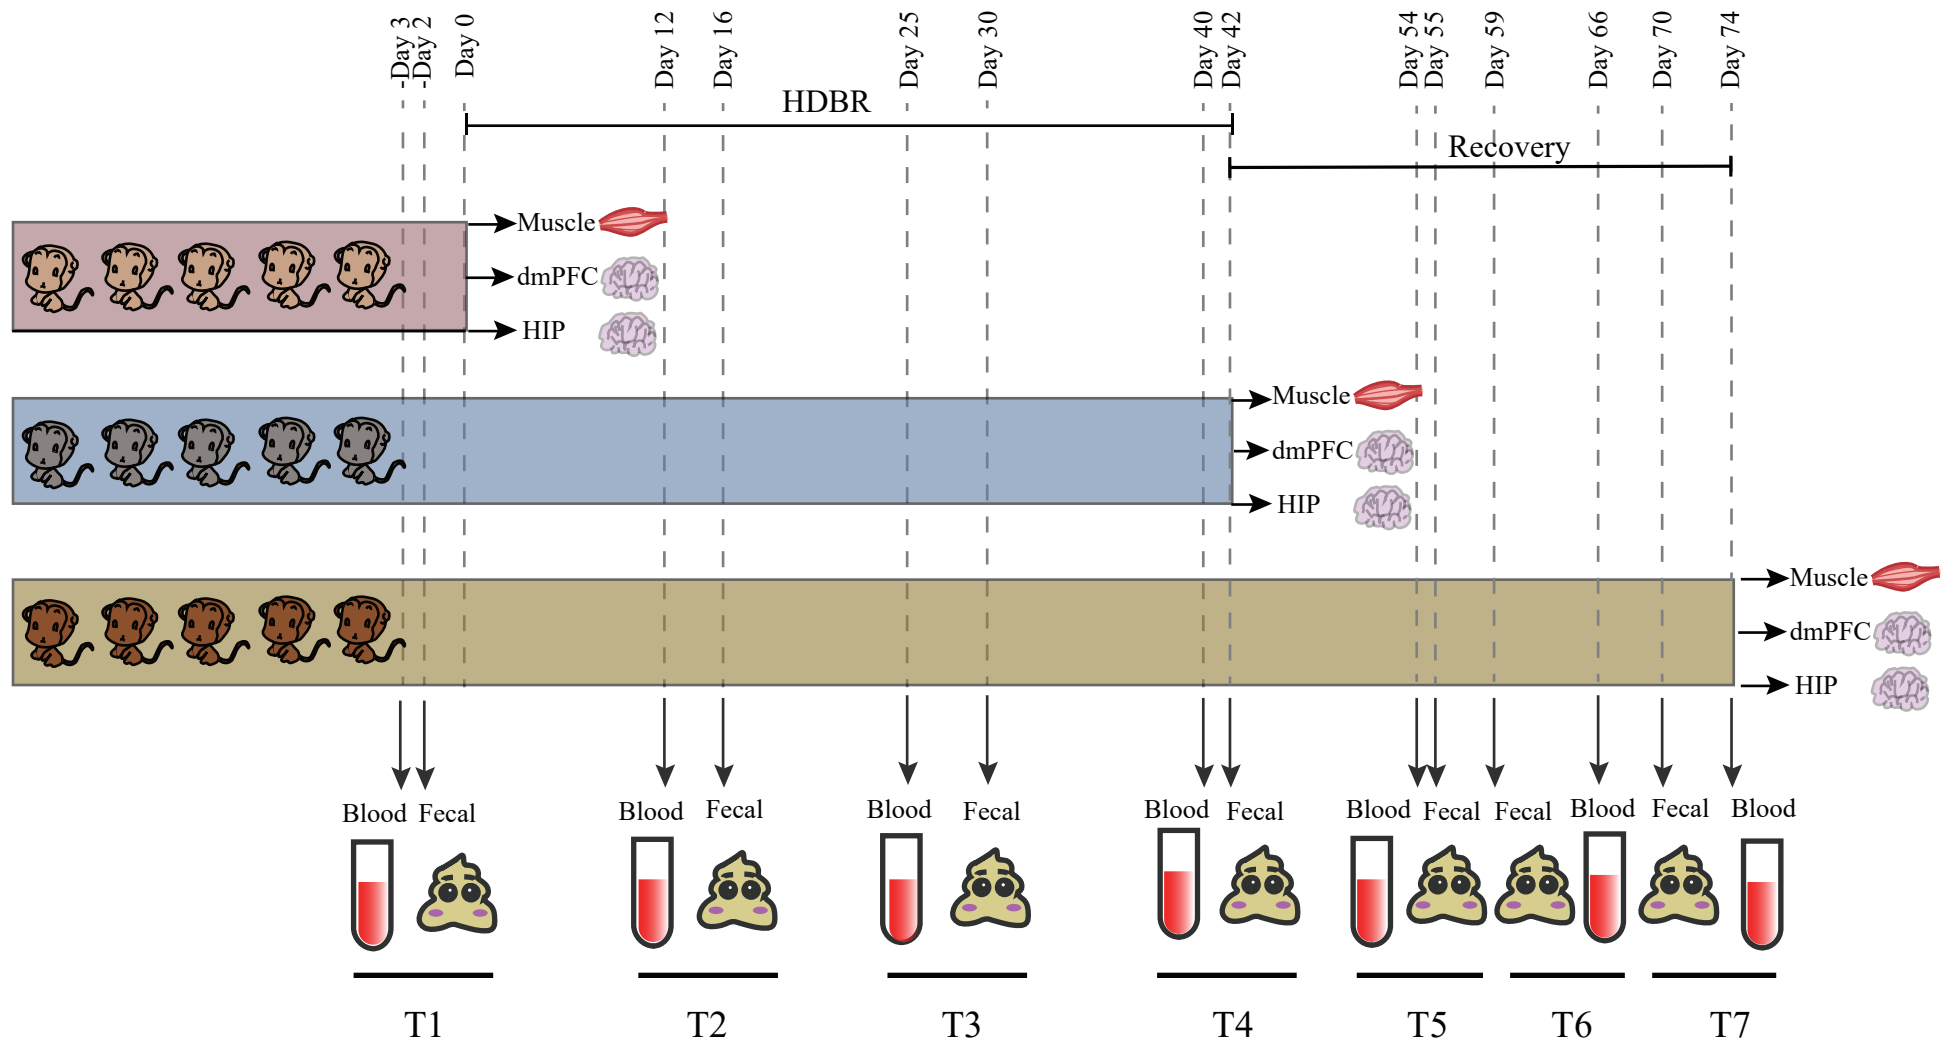

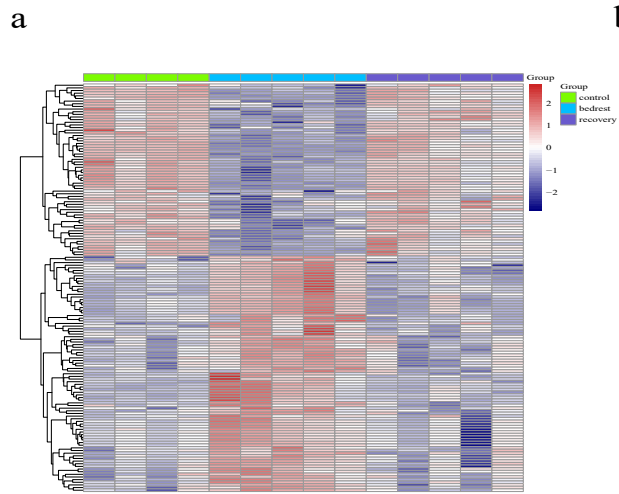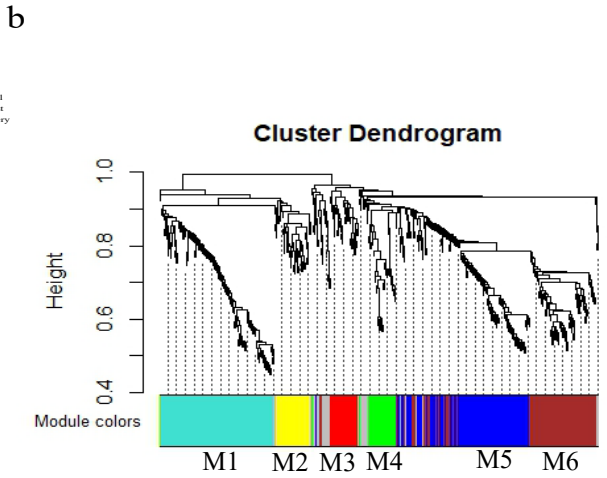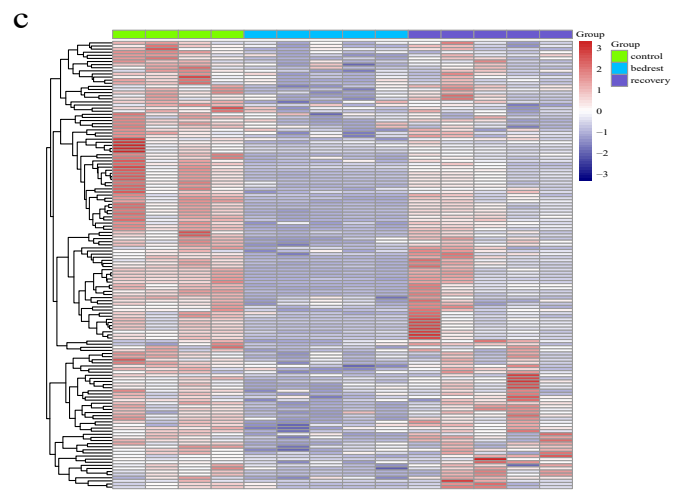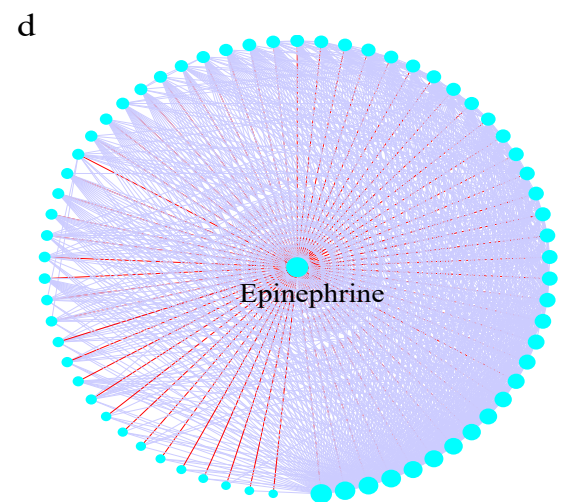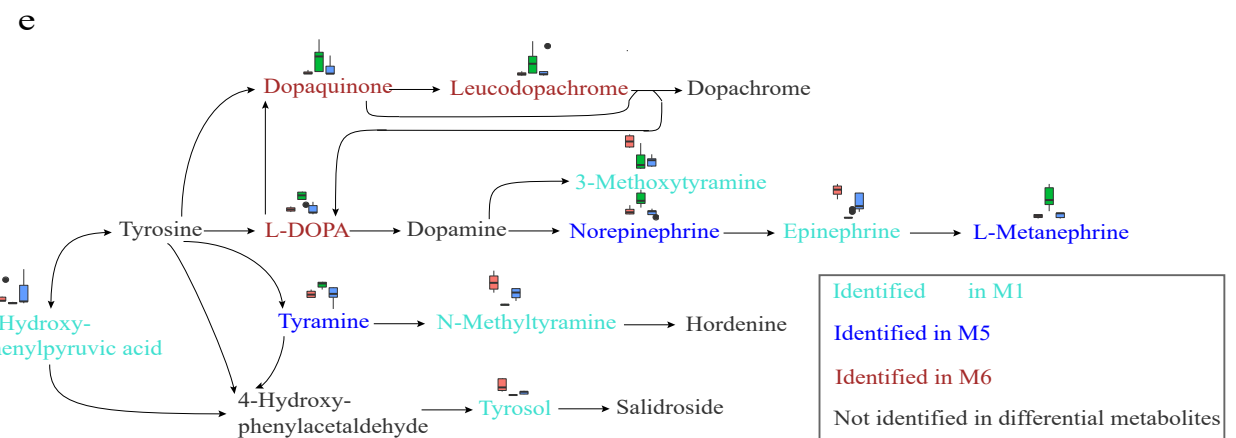

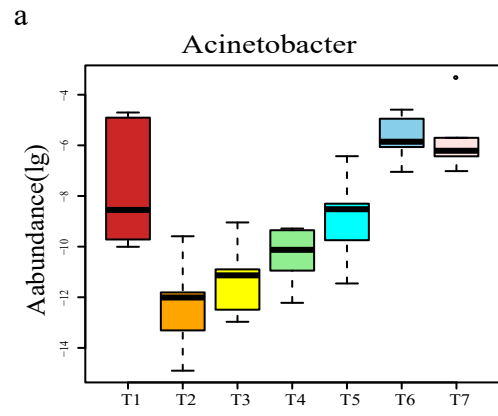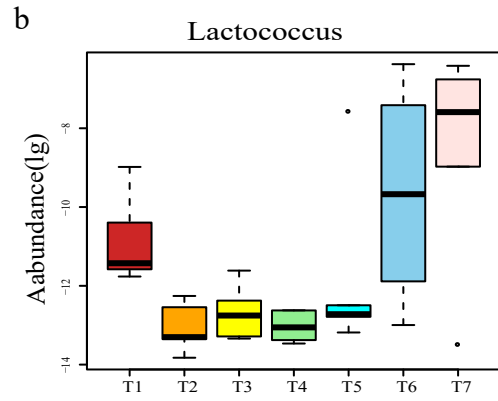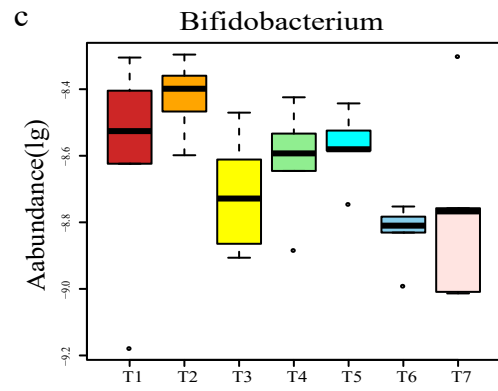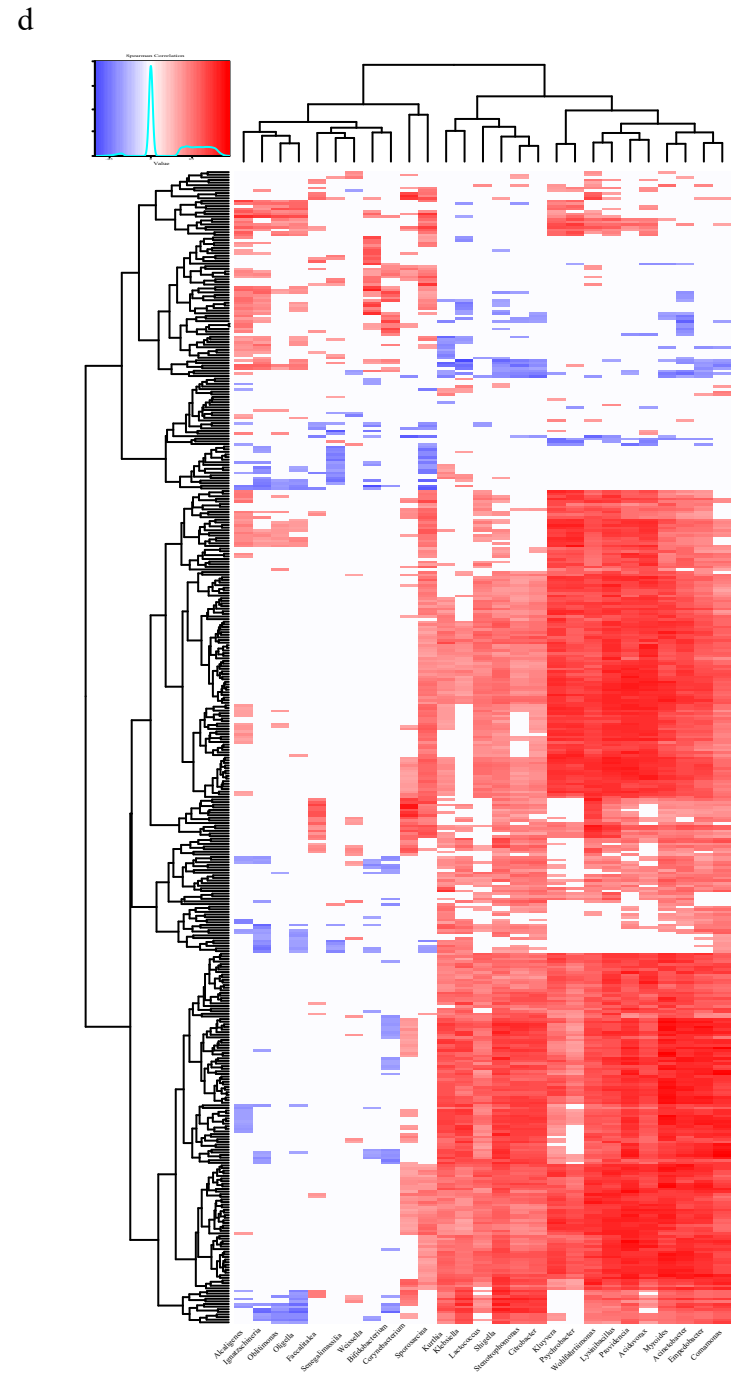

a

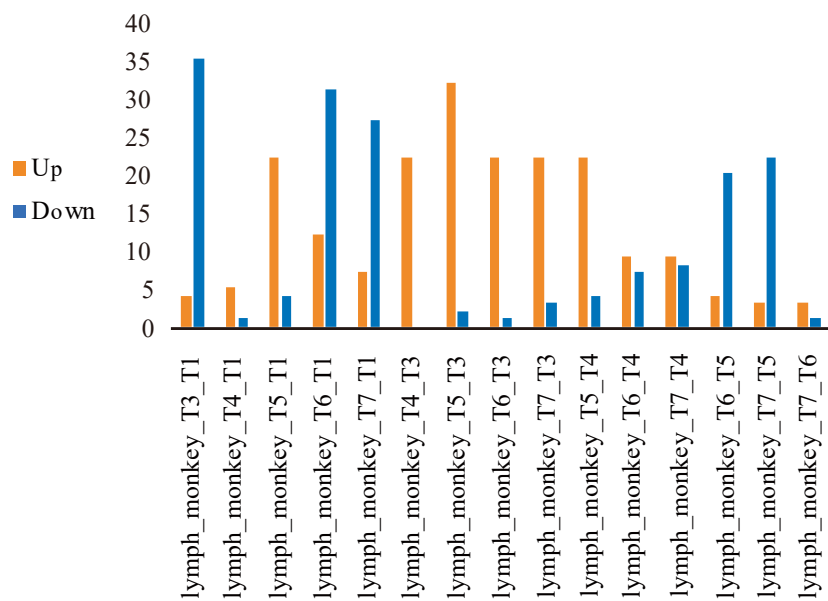

b

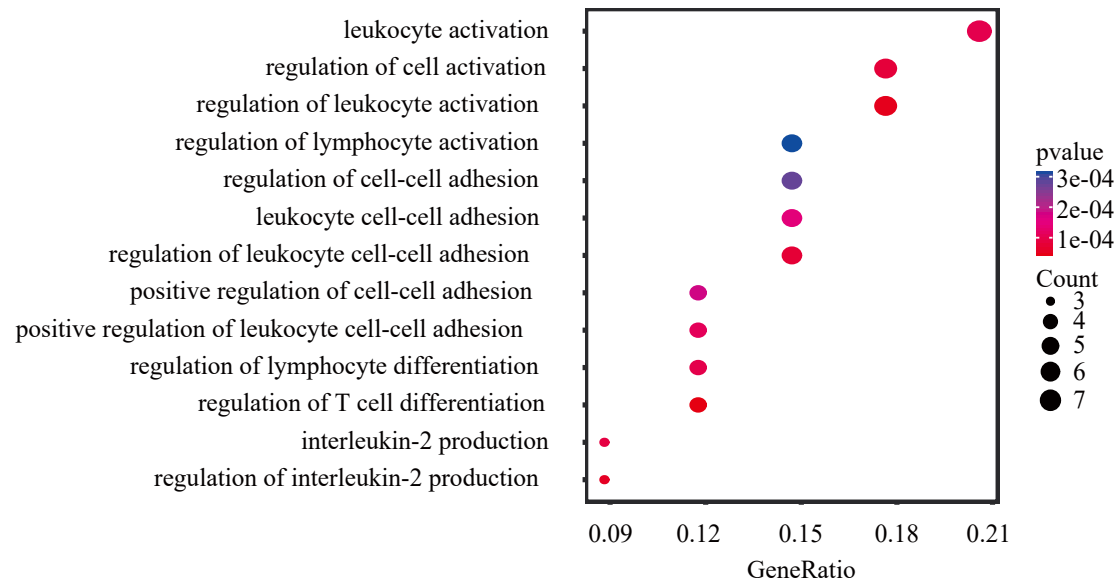

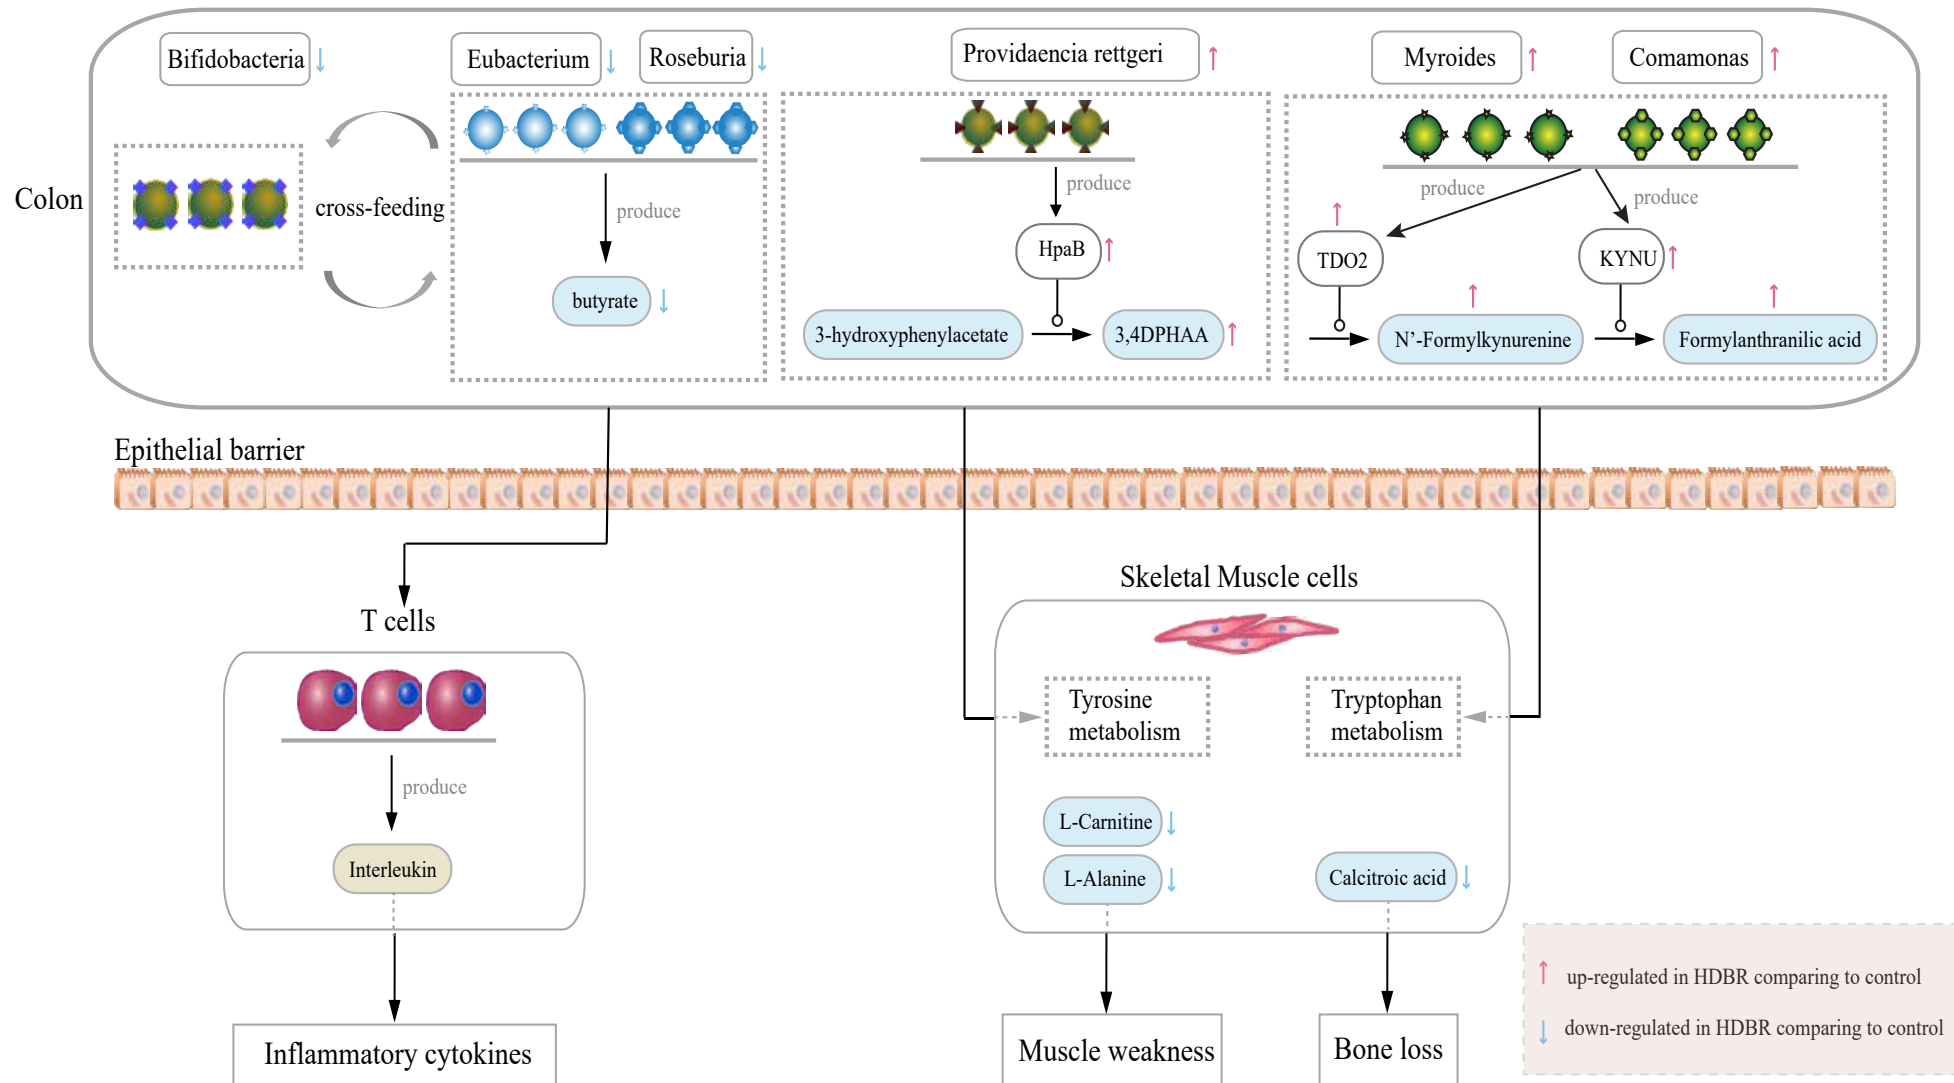

Source: https://www.biorxiv.org/content/10.1101/513382v1.full.pdf
